# Supplementary material
Source: MDPI journal article supplement (https://www.mdpi.com/2313-0105/7/2/33)
Supplement: s1 [file s1 › batteries-1151155-supplementary.pdf]

Supplementary

# The Influence of $\text{Li}_4\text{Ti}_5\text{O}_{12}$ Preparation Method on Lithium-Ion Capacitor Performance

Taofeek Akintola <sup>1,2</sup>, Annadanesh Shellikeri <sup>1,2</sup>, Tawakalt Akintola <sup>3,4</sup> and Jim P. Zheng <sup>1,2,5,\*</sup>

<sup>1</sup> Department of Electrical and Computer Engineering, Florida A&M University-Florida State University, Tallahassee, FL 32310-6046, USA; taofeek1.akintola@fam.u.edu (T.A.); ahs07e@my.fsu.edu (A.S.)

<sup>2</sup> Aero-Propulsion, Mechatronics and Energy (AME) Center, Florida State University, Tallahassee, FL 32310, USA

<sup>3</sup> Department of Industrial and Manufacturing Engineering, Florida A&M University-Florida State University, Tallahassee, FL 32310-6046, USA; tawakalt1.akintola@fam.u.edu

<sup>4</sup> High-Performance Materials Institute, Tallahassee, FL 32310, USA

<sup>5</sup> Department of Electrical Engineering, University of Buffalo, The State University of New York, Buffalo, NY 14260, USA

\* Correspondence: jzheng@buffalo.edu

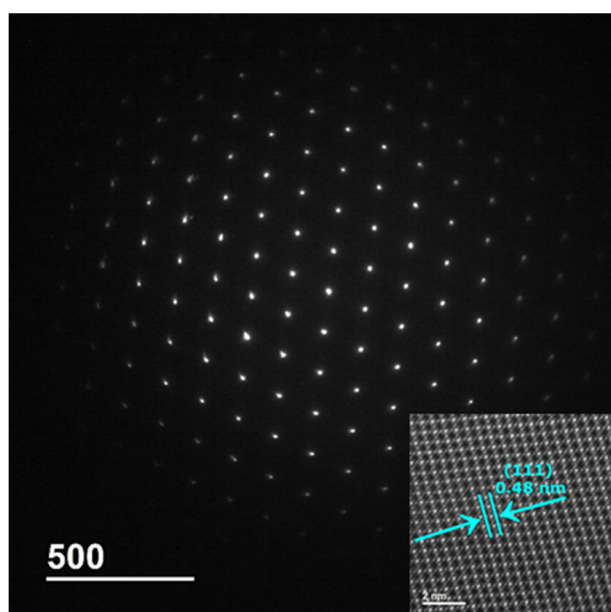

(a)

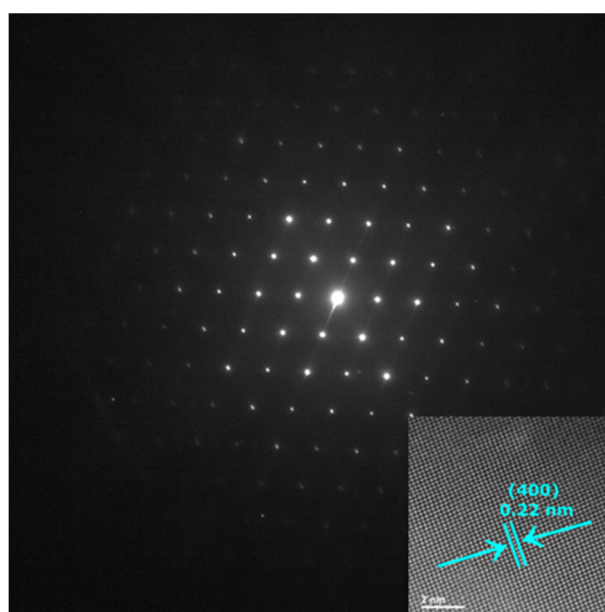

(b)

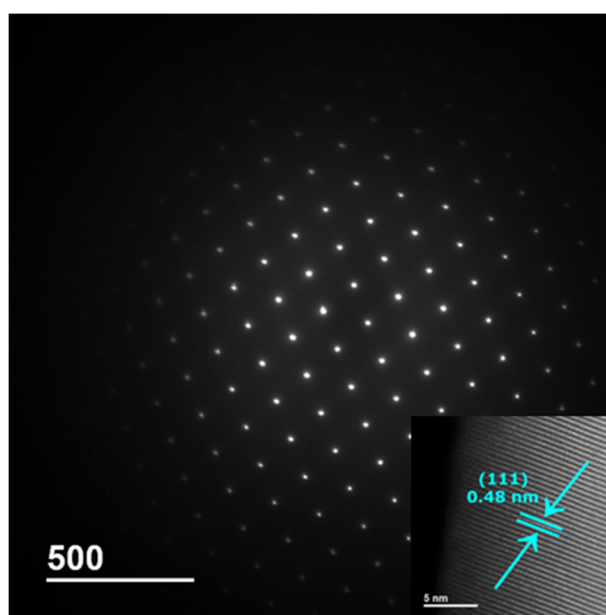

(c)

**Figure S1.** TEM diffraction of a single crystallite of (a) SG-NA, (b) SG-BM, and (c) SG-S samples. (inset STEM image).

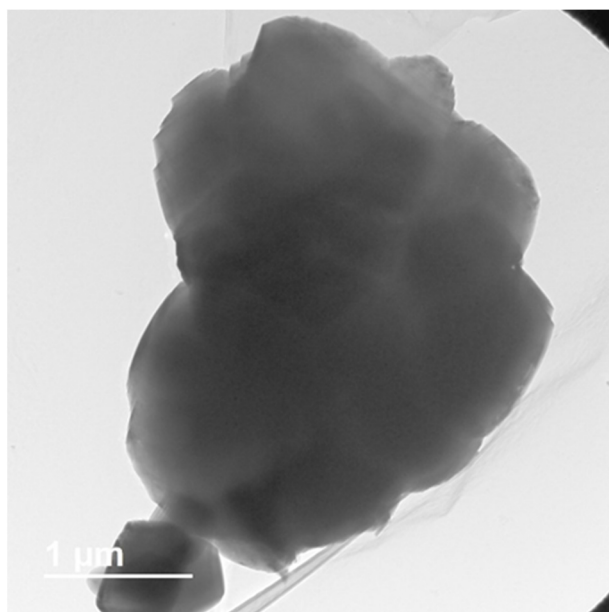

(a)

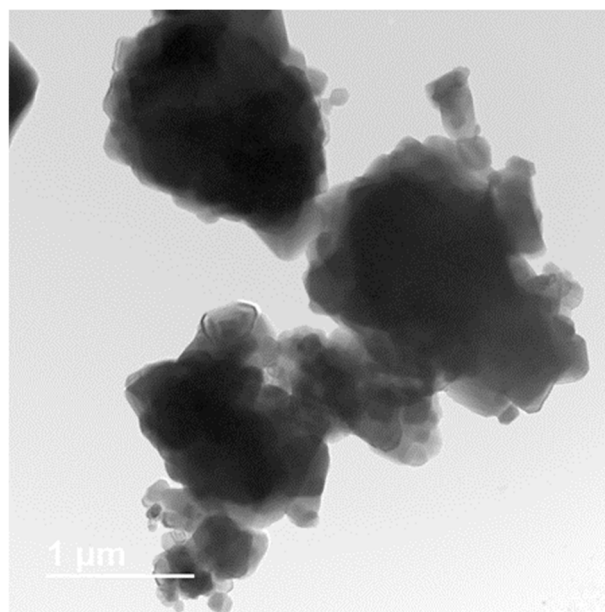

(b)

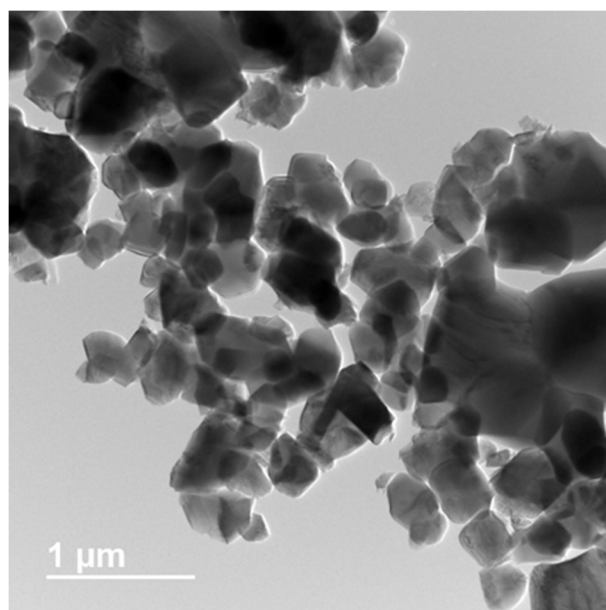

(c)

Figure S2. TEM images of the synthesized LTO samples: (a) SG-NA, (b) SG-BM, and (c) SG-S.

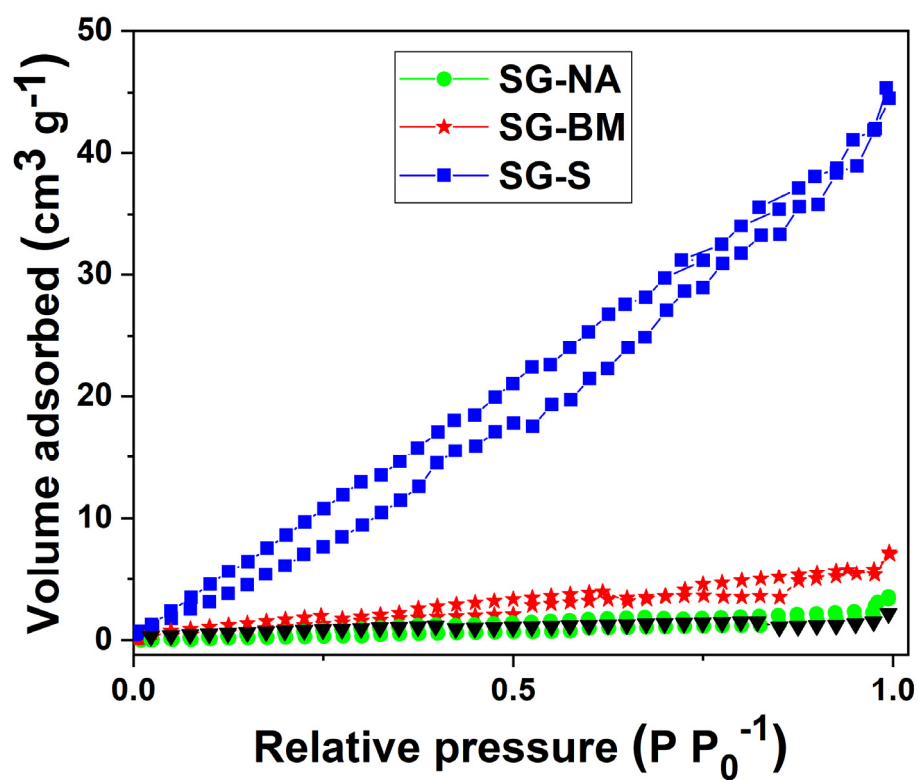

Figure S3. Nitrogen adsorption-desorption isotherm of the synthesized LTO samples.

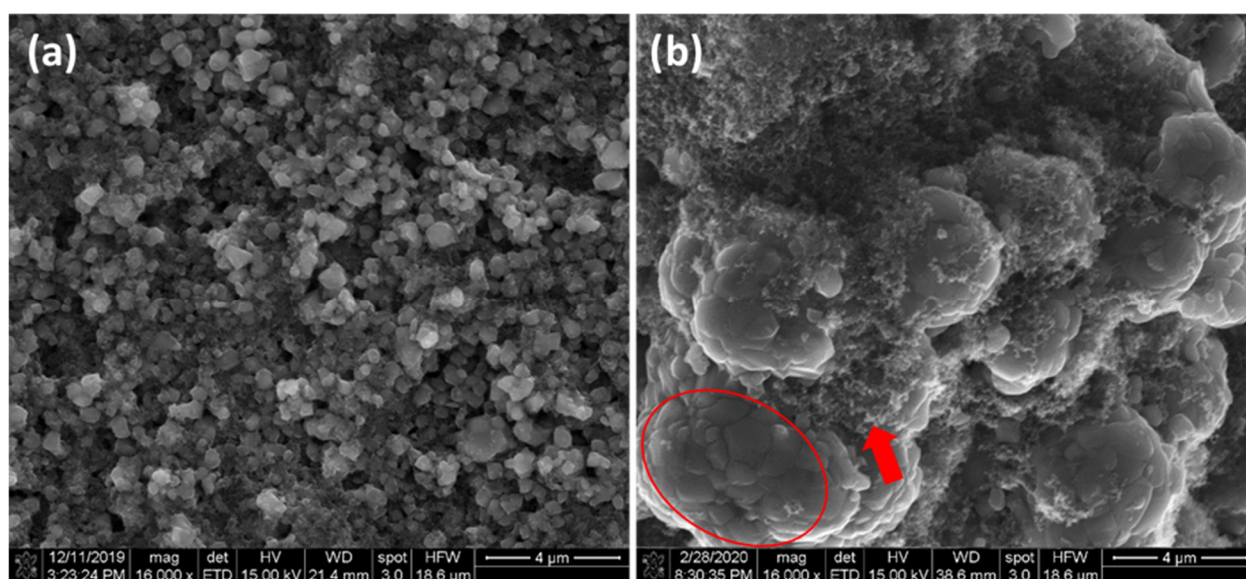

**Figure S4.** SEM image of the fabricated LTO anode electrodes: (a) SG-S, (b) SG-NA. Red circle indicates active material with no contact with the red arrow (carbon black).

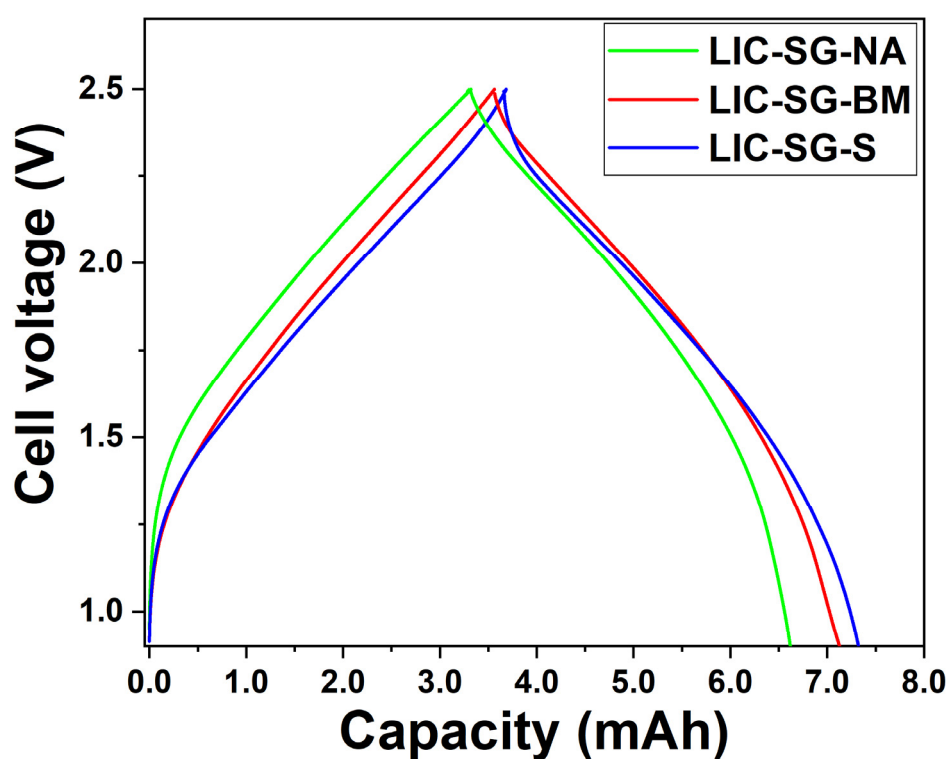

**Figure S5.** Voltage profile of LIC full cell balanced with a cathode to anode capacity ratio of 1.

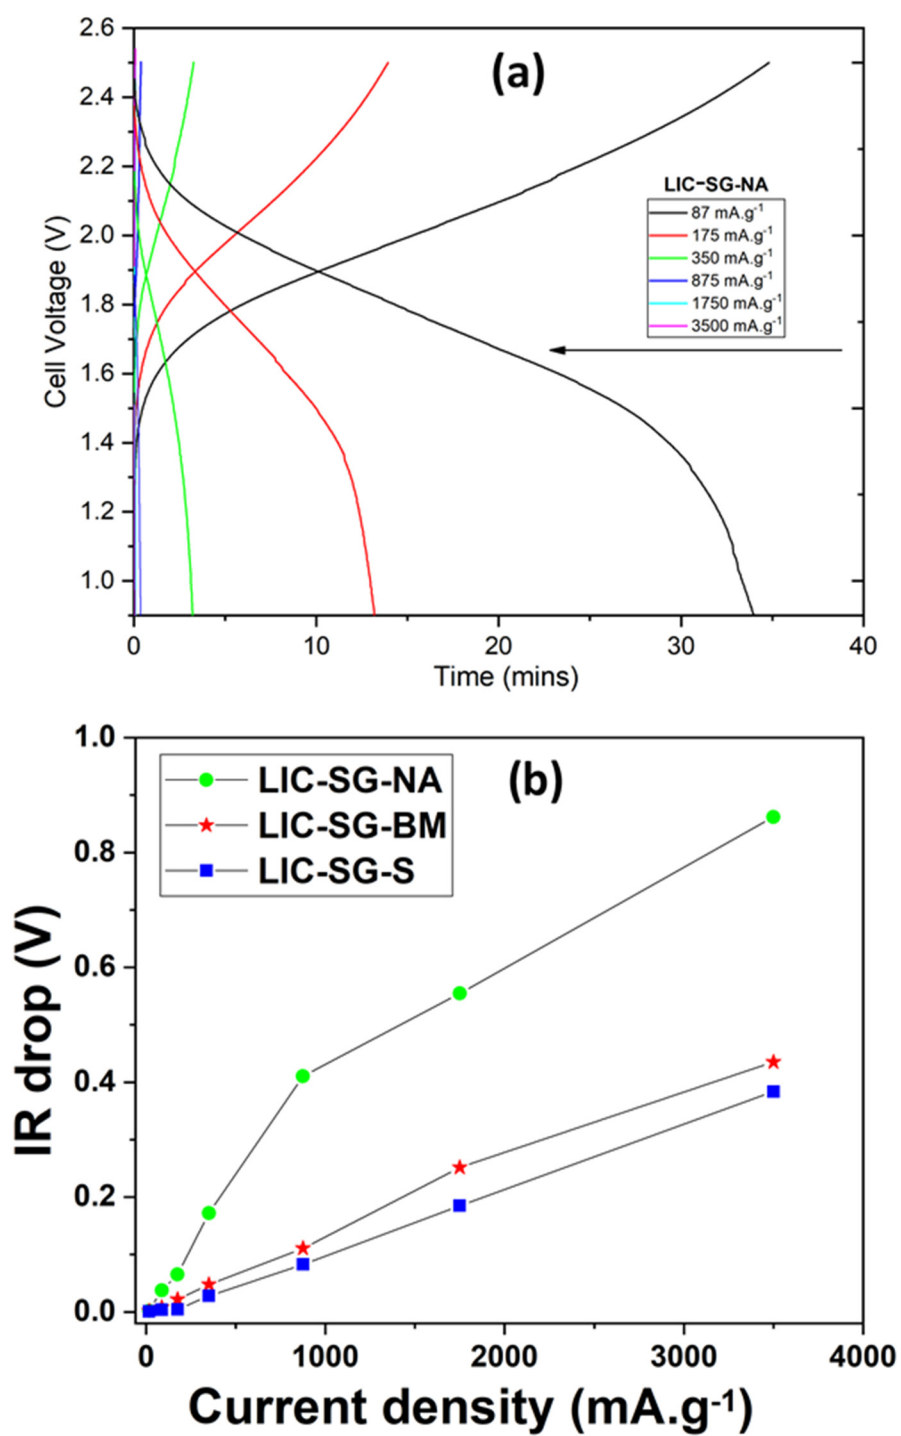

Figure S6. (a) Rate performance of the LIC cell with SG-NA anode, (b) IR drops of LIC cells.
